# Supplementary material
Source: publisher figshare collection journal article supplement (https://acs.figshare.com/ndownloader/files/4773871)
Supplement: Supplementary file 1 [file 4773871]

  
data_c20h29bn7o2pw
  
_audit_creation_method            SHELXL-97 
_chemical_name_systematic 
; 
 ? 
; 
_chemical_name_common             ? 
_chemical_melting_point           ? 
_chemical_formula_moiety          ? 
_chemical_formula_sum 
 'C20 H29 B N7 O2 P W' 
_chemical_formula_weight          625.13 
  
loop_ 
 _atom_type_symbol 
 _atom_type_description 
 _atom_type_scat_dispersion_real 
 _atom_type_scat_dispersion_imag 
 _atom_type_scat_source 
 'C'  'C'   0.0033   0.0016 
 'International Tables Vol C Tables 4.2.6.8 and 6.1.1.4' 
 'H'  'H'   0.0000   0.0000 
 'International Tables Vol C Tables 4.2.6.8 and 6.1.1.4' 
 'B'  'B'   0.0013   0.0007 
 'International Tables Vol C Tables 4.2.6.8 and 6.1.1.4' 
 'N'  'N'   0.0061   0.0033 
 'International Tables Vol C Tables 4.2.6.8 and 6.1.1.4' 
 'O'  'O'   0.0106   0.0060 
 'International Tables Vol C Tables 4.2.6.8 and 6.1.1.4' 
 'P'  'P'   0.1023   0.0942 
 'International Tables Vol C Tables 4.2.6.8 and 6.1.1.4' 
 'W'  'W'  -0.8490   6.8722 
 'International Tables Vol C Tables 4.2.6.8 and 6.1.1.4' 
  
_symmetry_cell_setting            Monoclinic 
_symmetry_space_group_name_H-M    P2(1)/c 
  
loop_ 
 _symmetry_equiv_pos_as_xyz 
 'x, y, z' 
 '-x, y+1/2, -z+1/2' 
 '-x, -y, -z' 
 'x, -y-1/2, z-1/2' 
  
_cell_length_a                    15.6626(10) 
_cell_length_b                    12.1938(7) 
_cell_length_c                    13.3061(8) 
_cell_angle_alpha                 90.00 
_cell_angle_beta                  111.5000(10) 
_cell_angle_gamma                 90.00 
_cell_volume                      2364.5(2) 
_cell_formula_units_Z             4 
_cell_measurement_temperature     153(2) 
_cell_measurement_reflns_used     6887 
_cell_measurement_theta_min       3.023      
_cell_measurement_theta_max       32.293 
  
_exptl_crystal_description        block 
_exptl_crystal_colour             greenish 
_exptl_crystal_size_max           0.31 
_exptl_crystal_size_mid           0.27 
_exptl_crystal_size_min           0.26 
_exptl_crystal_density_meas       'not measured' 
_exptl_crystal_density_diffrn     1.756 
_exptl_crystal_density_method     'not measured' 
_exptl_crystal_F_000              1232 
_exptl_absorpt_coefficient_mu     4.985 
_exptl_absorpt_correction_type    empirical 
_exptl_absorpt_correction_T_min   0.593447 
_exptl_absorpt_correction_T_max   0.801914  
_exptl_absorpt_process_details    Bruker SADABS 
  
_exptl_special_details 
; 
 ? 
; 
  
_diffrn_ambient_temperature       153(2) 
_diffrn_radiation_wavelength      0.71073 
_diffrn_radiation_type            MoK\a 
_diffrn_radiation_source          'fine-focus sealed tube' 
_diffrn_radiation_monochromator   graphite 
_diffrn_measurement_device_type   'Bruker SMART APEX CCD area detector' 
_diffrn_measurement_method        'phi and omega scans' 
_diffrn_detector_area_resol_mean  ? 
_diffrn_standards_number          ? 
_diffrn_standards_interval_count  ? 
_diffrn_standards_interval_time   ? 
_diffrn_standards_decay_%         ? 
_diffrn_reflns_number             27854 
_diffrn_reflns_av_R_equivalents   0.0329 
_diffrn_reflns_av_sigmaI/netI     0.0252 
_diffrn_reflns_limit_h_min        -23 
_diffrn_reflns_limit_h_max        23 
_diffrn_reflns_limit_k_min        -18 
_diffrn_reflns_limit_k_max        17 
_diffrn_reflns_limit_l_min        -19 
_diffrn_reflns_limit_l_max        19 
_diffrn_reflns_theta_min          3.02 
_diffrn_reflns_theta_max          32.40 
_reflns_number_total              8063 
_reflns_number_gt                 7067 
_reflns_threshold_expression      >2sigma(I) 
  
_computing_data_collection        'Bruker SMART' 
_computing_cell_refinement        'Bruker SMART' 
_computing_data_reduction         'Bruker SAINT' 
_computing_structure_solution     'SHELXS-97 (Sheldrick, 1990)' 
_computing_structure_refinement   'SHELXL-97 (Sheldrick, 1997)' 
_computing_molecular_graphics     'Bruker SHELXTL' 
_computing_publication_material   'Bruker SHELXTL' 
  
_refine_special_details 
; 
 Refinement of F^2^ against ALL reflections.  The weighted R-factor wR and 
 goodness of fit S are based on F^2^, conventional R-factors R are based 
 on F, with F set to zero for negative F^2^. The threshold expression of 
 F^2^ > 2sigma(F^2^) is used only for calculating R-factors(gt) etc. and is 
 not relevant to the choice of reflections for refinement.  R-factors based 
 on F^2^ are statistically about twice as large as those based on F, and R- 
 factors based on ALL data will be even larger. 
; 
  
_refine_ls_structure_factor_coef  Fsqd 
_refine_ls_matrix_type            full 
_refine_ls_weighting_scheme       calc 
_refine_ls_weighting_details 
 'calc w=1/[\s^2^(Fo^2^)+(0.0420P)^2^] where P=(Fo^2^+2Fc^2^)/3' 
_atom_sites_solution_primary      direct 
_atom_sites_solution_secondary    difmap 
_atom_sites_solution_hydrogens    difmap 
_refine_ls_hydrogen_treatment     refined 
_refine_ls_extinction_method      none 
_refine_ls_extinction_coef        none 
_refine_ls_number_reflns          8063 
_refine_ls_number_parameters      405 
_refine_ls_number_restraints      0 
_refine_ls_R_factor_all           0.0390 
_refine_ls_R_factor_gt            0.0325 
_refine_ls_wR_factor_ref          0.0786 
_refine_ls_wR_factor_gt           0.0760 
_refine_ls_goodness_of_fit_ref    1.062 
_refine_ls_restrained_S_all       1.062 
_refine_ls_shift/su_max           0.001 
_refine_ls_shift/su_mean          0.000 
  
loop_ 
 _atom_site_label 
 _atom_site_type_symbol 
 _atom_site_fract_x 
 _atom_site_fract_y 
 _atom_site_fract_z 
 _atom_site_U_iso_or_equiv 
 _atom_site_adp_type 
 _atom_site_occupancy 
 _atom_site_symmetry_multiplicity 
 _atom_site_calc_flag 
 _atom_site_refinement_flags 
 _atom_site_disorder_assembly 
 _atom_site_disorder_group 
W W 0.735415(7) 0.599041(9) 0.799203(9) 0.02138(4) Uani 1 1 d . . . 
P P 0.61491(6) 0.53024(7) 0.86433(7) 0.02914(16) Uani 1 1 d . . . 
O1 O 0.8845(4) 0.8656(4) 0.8119(6) 0.123(3) Uani 1 1 d . . . 
O2 O 0.59229(16) 0.7326(2) 0.63101(19) 0.0328(5) Uani 1 1 d . . . 
N1 N 0.69189(18) 0.4568(2) 0.6916(2) 0.0272(5) Uani 1 1 d . . . 
N2 N 0.7475(2) 0.3695(3) 0.6966(2) 0.0325(6) Uani 1 1 d . . . 
N3 N 0.83087(19) 0.4826(2) 0.9200(2) 0.0312(6) Uani 1 1 d . . . 
N4 N 0.8666(2) 0.3956(2) 0.8842(3) 0.0335(6) Uani 1 1 d . . . 
N5 N 0.84306(18) 0.5855(2) 0.7285(2) 0.0288(5) Uani 1 1 d . . . 
N6 N 0.88314(19) 0.4869(3) 0.7248(2) 0.0334(6) Uani 1 1 d . . . 
N7 N 0.65298(17) 0.6808(2) 0.7002(2) 0.0226(5) Uani 1 1 d . . . 
C1 C 0.8192(3) 0.8374(4) 0.8355(5) 0.0579(13) Uani 1 1 d . . . 
C2 C 0.7329(3) 0.9091(3) 0.8025(3) 0.0433(10) Uani 1 1 d . . . 
C3 C 0.6762(3) 0.8876(3) 0.8702(3) 0.0366(7) Uani 1 1 d . . . 
C4 C 0.6847(3) 0.7978(3) 0.9292(3) 0.0341(7) Uani 1 1 d . . . 
C5 C 0.7523(3) 0.7120(3) 0.9371(3) 0.0342(7) Uani 1 1 d . . . 
C6 C 0.8217(2) 0.7353(3) 0.8922(4) 0.0440(10) Uani 1 1 d . . . 
C7 C 0.7548(4) 1.0304(4) 0.7986(4) 0.0586(12) Uani 1 1 d . . . 
C8 C 0.8087(6) 1.0781(5) 0.9076(6) 0.0784(19) Uani 1 1 d . . . 
C9 C 0.7031(3) 0.2987(4) 0.6172(3) 0.0442(9) Uani 1 1 d . . . 
C10 C 0.6168(3) 0.3377(4) 0.5606(3) 0.0440(9) Uani 1 1 d . . . 
C11 C 0.6129(2) 0.4376(3) 0.6094(3) 0.0324(7) Uani 1 1 d . . . 
C12 C 0.9231(3) 0.3395(3) 0.9706(4) 0.0452(10) Uani 1 1 d . . . 
C13 C 0.9250(3) 0.3886(4) 1.0631(4) 0.0484(11) Uani 1 1 d . . . 
C14 C 0.8669(3) 0.4778(4) 1.0292(3) 0.0410(8) Uani 1 1 d . . . 
C15 C 0.9434(3) 0.4985(4) 0.6755(3) 0.0453(9) Uani 1 1 d . . . 
C16 C 0.9427(3) 0.6051(4) 0.6452(4) 0.0482(10) Uani 1 1 d . . . 
C17 C 0.8795(2) 0.6579(4) 0.6798(3) 0.0370(7) Uani 1 1 d . . . 
C18 C 0.5071(3) 0.6035(4) 0.8049(4) 0.0481(11) Uani 1 1 d . . . 
C19 C 0.6336(4) 0.5337(4) 1.0069(3) 0.0449(9) Uani 1 1 d . . . 
C20 C 0.5829(4) 0.3869(4) 0.8364(4) 0.0505(11) Uani 1 1 d . . . 
B B 0.8513(3) 0.3816(3) 0.7646(4) 0.0356(8) Uani 1 1 d . . . 
H1B H 0.889(3) 0.309(4) 0.751(4) 0.045(12) Uiso 1 1 d . . . 
H2 H 0.698(5) 0.888(5) 0.723(5) 0.075(19) Uiso 1 1 d . . . 
H3 H 0.627(3) 0.944(3) 0.866(3) 0.030(10) Uiso 1 1 d . . . 
H4 H 0.643(3) 0.788(3) 0.961(3) 0.028(10) Uiso 1 1 d . . . 
H5 H 0.770(3) 0.676(3) 1.004(3) 0.034(10) Uiso 1 1 d . . . 
H6 H 0.878(4) 0.703(4) 0.926(4) 0.054(14) Uiso 1 1 d . . . 
H7A H 0.691(5) 1.082(5) 0.777(6) 0.08(2) Uiso 1 1 d . . . 
H7B H 0.802(4) 1.036(5) 0.751(5) 0.070(16) Uiso 1 1 d . . . 
H8A H 0.828(4) 1.161(5) 0.903(4) 0.065(16) Uiso 1 1 d . . . 
H8B H 0.769(8) 1.061(9) 0.967(9) 0.18(4) Uiso 1 1 d . . . 
H8C H 0.876(6) 1.047(7) 0.943(6) 0.11(3) Uiso 1 1 d . . . 
H9 H 0.724(4) 0.243(4) 0.610(4) 0.056(15) Uiso 1 1 d . . . 
H10 H 0.570(4) 0.303(4) 0.504(4) 0.059(15) Uiso 1 1 d . . . 
H11 H 0.563(3) 0.492(4) 0.596(3) 0.042(12) Uiso 1 1 d . . . 
H12 H 0.948(4) 0.283(5) 0.954(5) 0.072(18) Uiso 1 1 d . . . 
H13 H 0.953(3) 0.371(4) 1.132(4) 0.044(12) Uiso 1 1 d . . . 
H14 H 0.850(3) 0.529(3) 1.073(3) 0.031(10) Uiso 1 1 d . . . 
H15 H 0.973(3) 0.439(4) 0.665(3) 0.035(11) Uiso 1 1 d . . . 
H16 H 0.974(4) 0.639(4) 0.614(4) 0.056(14) Uiso 1 1 d . . . 
H17 H 0.865(3) 0.737(4) 0.674(4) 0.048(13) Uiso 1 1 d . . . 
H18A H 0.487(4) 0.598(4) 0.721(5) 0.052(15) Uiso 1 1 d . . . 
H18B H 0.468(6) 0.573(6) 0.827(7) 0.12(3) Uiso 1 1 d . . . 
H18C H 0.516(4) 0.687(5) 0.834(4) 0.066(16) Uiso 1 1 d . . . 
H19A H 0.654(5) 0.588(5) 1.031(5) 0.07(2) Uiso 1 1 d . . . 
H19B H 0.584(4) 0.494(5) 1.025(4) 0.063(15) Uiso 1 1 d . . . 
H19C H 0.694(4) 0.501(5) 1.046(5) 0.072(17) Uiso 1 1 d . . . 
H20A H 0.562(4) 0.367(5) 0.758(5) 0.063(15) Uiso 1 1 d . . . 
H20B H 0.635(3) 0.343(4) 0.871(4) 0.039(12) Uiso 1 1 d . . . 
H20C H 0.535(3) 0.369(4) 0.862(4) 0.038(11) Uiso 1 1 d . . . 
  
loop_ 
 _atom_site_aniso_label 
 _atom_site_aniso_U_11 
 _atom_site_aniso_U_22 
 _atom_site_aniso_U_33 
 _atom_site_aniso_U_23 
 _atom_site_aniso_U_13 
 _atom_site_aniso_U_12 
W 0.01657(6) 0.02437(6) 0.02064(6) -0.00167(4) 0.00379(4) -0.00041(4) 
P 0.0309(4) 0.0325(4) 0.0268(4) 0.0043(3) 0.0138(3) -0.0015(3) 
O1 0.117(4) 0.066(3) 0.255(7) -0.054(4) 0.148(5) -0.053(3) 
O2 0.0269(11) 0.0400(13) 0.0285(11) 0.0072(9) 0.0066(9) 0.0076(9) 
N1 0.0237(12) 0.0265(12) 0.0273(12) -0.0048(10) 0.0045(10) -0.0003(9) 
N2 0.0309(14) 0.0278(13) 0.0345(15) -0.0072(11) 0.0070(12) 0.0017(11) 
N3 0.0252(12) 0.0333(14) 0.0288(13) 0.0017(11) 0.0025(10) 0.0046(10) 
N4 0.0248(13) 0.0306(14) 0.0375(15) 0.0017(11) 0.0023(11) 0.0055(10) 
N5 0.0200(11) 0.0338(14) 0.0306(13) 0.0019(10) 0.0069(10) 0.0025(10) 
N6 0.0232(12) 0.0405(16) 0.0378(15) -0.0002(12) 0.0126(11) 0.0064(11) 
N7 0.0197(10) 0.0252(12) 0.0244(11) -0.0008(9) 0.0099(9) -0.0021(9) 
C1 0.054(3) 0.044(2) 0.091(4) -0.026(2) 0.044(3) -0.026(2) 
C2 0.054(3) 0.0325(19) 0.046(2) -0.0023(15) 0.022(2) -0.0167(16) 
C3 0.0398(19) 0.0290(17) 0.045(2) -0.0014(14) 0.0195(16) -0.0006(13) 
C4 0.0403(18) 0.0315(16) 0.0349(16) -0.0048(13) 0.0189(15) -0.0029(14) 
C5 0.0391(18) 0.0296(16) 0.0255(14) -0.0072(12) 0.0019(13) -0.0009(13) 
C6 0.0207(15) 0.043(2) 0.058(2) -0.0243(18) 0.0028(15) -0.0073(14) 
C7 0.062(3) 0.053(3) 0.057(3) 0.002(2) 0.016(2) -0.013(2) 
C8 0.095(5) 0.053(3) 0.078(4) -0.012(3) 0.019(4) -0.030(3) 
C9 0.053(2) 0.0341(19) 0.0409(19) -0.0159(16) 0.0111(17) -0.0036(17) 
C10 0.045(2) 0.042(2) 0.0368(18) -0.0133(16) 0.0052(16) -0.0087(17) 
C11 0.0299(16) 0.0367(17) 0.0263(14) -0.0059(13) 0.0052(12) -0.0047(13) 
C12 0.0329(18) 0.0347(19) 0.052(2) 0.0069(17) -0.0027(17) 0.0072(15) 
C13 0.038(2) 0.047(2) 0.042(2) 0.0116(17) -0.0071(17) 0.0056(16) 
C14 0.0345(18) 0.048(2) 0.0299(16) 0.0029(15) -0.0005(14) 0.0039(16) 
C15 0.0280(17) 0.066(3) 0.046(2) -0.006(2) 0.0179(16) 0.0078(18) 
C16 0.035(2) 0.070(3) 0.046(2) 0.008(2) 0.0224(18) 0.0023(18) 
C17 0.0306(17) 0.046(2) 0.0335(16) 0.0083(15) 0.0105(14) -0.0003(14) 
C18 0.0304(19) 0.064(3) 0.057(3) 0.015(2) 0.0246(19) 0.0055(17) 
C19 0.061(3) 0.047(2) 0.0335(18) 0.0053(17) 0.0260(19) -0.002(2) 
C20 0.063(3) 0.043(2) 0.051(3) 0.0022(19) 0.028(2) -0.017(2) 
B 0.0283(18) 0.0323(19) 0.042(2) -0.0023(16) 0.0080(16) 0.0073(14) 
  
_geom_special_details 
; 
 All esds (except the esd in the dihedral angle between two l.s. planes) 
 are estimated using the full covariance matrix.  The cell esds are taken 
 into account individually in the estimation of esds in distances, angles 
 and torsion angles; correlations between esds in cell parameters are only 
 used when they are defined by crystal symmetry.  An approximate (isotropic) 
 treatment of cell esds is used for estimating esds involving l.s. planes. 
; 
  
loop_ 
 _geom_bond_atom_site_label_1 
 _geom_bond_atom_site_label_2 
 _geom_bond_distance 
 _geom_bond_site_symmetry_2 
 _geom_bond_publ_flag 
W N7 1.775(3) . ? 
W N1 2.192(3) . ? 
W C6 2.212(3) . ? 
W N5 2.218(3) . ? 
W C5 2.232(3) . ? 
W N3 2.252(3) . ? 
W P 2.4932(8) . ? 
P C19 1.811(4) . ? 
P C18 1.816(4) . ? 
P C20 1.819(5) . ? 
O1 C1 1.225(5) . ? 
O2 N7 1.228(3) . ? 
N1 C11 1.338(4) . ? 
N1 N2 1.362(4) . ? 
N2 C9 1.344(5) . ? 
N2 B 1.551(5) . ? 
N3 C14 1.354(5) . ? 
N3 N4 1.364(4) . ? 
N4 C12 1.352(5) . ? 
N4 B 1.529(6) . ? 
N5 C17 1.340(5) . ? 
N5 N6 1.365(4) . ? 
N6 C15 1.340(5) . ? 
N6 B 1.540(6) . ? 
C1 C6 1.449(7) . ? 
C1 C2 1.532(7) . ? 
C2 C3 1.502(6) . ? 
C2 C7 1.524(6) . ? 
C3 C4 1.325(5) . ? 
C4 C5 1.465(5) . ? 
C5 C6 1.447(6) . ? 
C7 C8 1.502(8) . ? 
C9 C10 1.369(6) . ? 
C10 C11 1.393(5) . ? 
C12 C13 1.359(7) . ? 
C13 C14 1.384(6) . ? 
C15 C16 1.359(7) . ? 
C16 C17 1.392(6) . ? 
  
loop_ 
 _geom_angle_atom_site_label_1 
 _geom_angle_atom_site_label_2 
 _geom_angle_atom_site_label_3 
 _geom_angle 
 _geom_angle_site_symmetry_1 
 _geom_angle_site_symmetry_3 
 _geom_angle_publ_flag 
N7 W N1 89.54(11) . . ? 
N7 W C6 97.04(15) . . ? 
N1 W C6 160.00(13) . . ? 
N7 W N5 100.73(11) . . ? 
N1 W N5 76.51(10) . . ? 
C6 W N5 83.70(13) . . ? 
N7 W C5 95.66(12) . . ? 
N1 W C5 160.07(13) . . ? 
C6 W C5 37.99(15) . . ? 
N5 W C5 121.03(13) . . ? 
N7 W N3 174.78(11) . . ? 
N1 W N3 86.17(10) . . ? 
C6 W N3 87.99(15) . . ? 
N5 W N3 81.18(11) . . ? 
C5 W N3 87.41(12) . . ? 
N7 W P 90.55(8) . . ? 
N1 W P 82.35(8) . . ? 
C6 W P 116.30(12) . . ? 
N5 W P 155.85(7) . . ? 
C5 W P 78.38(10) . . ? 
N3 W P 85.92(8) . . ? 
C19 P C18 102.2(2) . . ? 
C19 P C20 99.4(2) . . ? 
C18 P C20 104.0(3) . . ? 
C19 P W 120.29(17) . . ? 
C18 P W 112.63(15) . . ? 
C20 P W 116.08(17) . . ? 
C11 N1 N2 106.6(3) . . ? 
C11 N1 W 130.2(2) . . ? 
N2 N1 W 123.1(2) . . ? 
C9 N2 N1 109.1(3) . . ? 
C9 N2 B 130.6(3) . . ? 
N1 N2 B 117.9(3) . . ? 
C14 N3 N4 106.2(3) . . ? 
C14 N3 W 134.4(3) . . ? 
N4 N3 W 119.4(2) . . ? 
C12 N4 N3 108.7(3) . . ? 
C12 N4 B 129.3(3) . . ? 
N3 N4 B 121.5(3) . . ? 
C17 N5 N6 106.3(3) . . ? 
C17 N5 W 132.9(2) . . ? 
N6 N5 W 120.8(2) . . ? 
C15 N6 N5 109.9(3) . . ? 
C15 N6 B 129.2(3) . . ? 
N5 N6 B 120.7(3) . . ? 
O2 N7 W 176.3(2) . . ? 
O1 C1 C6 120.6(5) . . ? 
O1 C1 C2 119.9(5) . . ? 
C6 C1 C2 119.5(4) . . ? 
C3 C2 C7 112.3(4) . . ? 
C3 C2 C1 112.4(4) . . ? 
C7 C2 C1 112.2(4) . . ? 
C4 C3 C2 123.1(4) . . ? 
C3 C4 C5 123.1(3) . . ? 
C6 C5 C4 117.6(3) . . ? 
C6 C5 W 70.3(2) . . ? 
C4 C5 W 121.1(2) . . ? 
C5 C6 C1 120.2(4) . . ? 
C5 C6 W 71.75(19) . . ? 
C1 C6 W 117.4(3) . . ? 
C8 C7 C2 113.4(5) . . ? 
N2 C9 C10 109.4(4) . . ? 
C9 C10 C11 104.5(3) . . ? 
N1 C11 C10 110.4(3) . . ? 
N4 C12 C13 109.7(4) . . ? 
C12 C13 C14 104.9(4) . . ? 
N3 C14 C13 110.4(4) . . ? 
N6 C15 C16 108.4(4) . . ? 
C15 C16 C17 105.9(4) . . ? 
N5 C17 C16 109.6(4) . . ? 
N4 B N6 108.5(3) . . ? 
N4 B N2 110.4(3) . . ? 
N6 B N2 106.3(3) . . ? 
  
_diffrn_measured_fraction_theta_max    0.950 
_diffrn_reflns_theta_full              32.40 
_diffrn_measured_fraction_theta_full   0.950 
_refine_diff_density_max    2.390 
_refine_diff_density_min   -0.603 
_refine_diff_density_rms    0.142 
